# Supplementary material for: Neurofilaments in Sporadic and Familial Amyotrophic Lateral Sclerosis: A Systematic Review and Meta-Analysis
Source: MDPI journal article supplement (doi:10.3390/genes15040496), 2024-04-16
Supplement: s1 [file s1]

## **Supplementary Appendix**

Shahim P, Norato G, et al. Neurofilaments in amyotrophic lateral sclerosis: a system review and meta-analysis.

**Appendix 1.** Detailed Search Methods.

**Appendix 2.** Data Inclusion for Studies with Duplicated Data

**Appendix 3.** Outcome Assessment.

**Appendix 4.** QUADAS-2.

**Appendix 5.** Quantification of Plasma and Serum NfL.

**Appendix 6.** Statistical Analysis.

**Table S1.** Study Characteristics.

**Table S2.** Excluded Studies.

**Figure S1.** Forest Plots and Receiver Operating Characteristics Curves for the Diagnostic Accuracy of Serum NfL.

**Figure S2.** Group Differences in Biomarkers Between ALS, ALS Mimic, and Controls.

**Figure S3.** Correlation Plasma and Serum NfL.

**Figure S4.** Meta-analysis of Correlation CSF and Plasma pNfH.

**Figure S5.** Meta-analysis of Relationships of pNfH and NfL Measured in CSF and ALSFRS-R and Disease Progression.

**Figure S6.** Meta-analysis of Correlation Between Serum NfL and Survival Time.

**Figure S7.** Risk of Bias and Concerns for Applicability Assessment

**Table S3.** Sample Size Per Group for Various Effect Estimates.

**Table S4.** Sample Size for Paired Assessments at Various Effect Sizes using Longitudinal Studies.

**Table S5.** Review of Studies of Neurofilaments Across ALS-FTD Spectrum.

**Table S6.** Review of Studies of Neurofilaments in ALS Mutation Carriers.

**Table S7.** Review of Studies of Neurofilaments in Presymptomatic ALS patients.

**References.**

## **Appendix 1. Detailed Search Methods.**

### *Literature Search*

This study was conducted in accordance with Preferred Reporting Items for Systemic Reviews and Meta-analysis (PRISMA) reporting guidelines<sup>1</sup> and the Diagnostic Test Accuracy extension.<sup>2</sup> The review protocol with minor adjustments was registered in <sup>3-37</sup>

We performed a systemic literature search from inception to August 1, 2022, and an updated search on August 17, 2023: PubMed/MEDLINE, Embase, Web of Sciences, and Cochrane Central Register of Controlled Trials (CENTRAL). Our search included the following search terms: biomarker, neurofilament light, NfL, NF-L, phosphorylated neurofilament heavy chain, pNfH, NF-H AND amyotrophic lateral sclerosis, and ALS. In addition to the database searches, we reviewed the reference lists of all included articles for potential eligibility. The database search was conducted by a National Institutes of Health Librarian/informationist.

### *Study Selection*

After the completion of all databases searches, all results were imported into citation management software EndNote 20 (Clarivate Analytics) and duplicates were removed. Next, the citations were exported into Covidence systemic review screening software (Veritas Health Innovations, Ltd.). Using Covidence, two reviewers (P.S. and G.C.) screened title and abstract to assess eligibility criteria and disagreements were resolved by consensus. Full text screening was conducted by (P.S. and G.C.) independently. Overall, there was an excellent agreement between the two reviewers (Cohen's  $\kappa = 0.93$ ).

### *Additional Exclusion Criteria*

We excluded conference proceedings and studies where we could not extract the data (e.g., figures could not be digitized), as well as studies where there was uncertainty regarding the demographic factors or biomarker concentration units.

## Appendix 2. Data Inclusion for Studies with Duplicated Data.

Data that were duplicated across more than one publication were not duplicated in our analysis nor included in our summary data in Table 1. However, duplicated data that reported their data in a different fashion, e.g., ROC curves or summary statistics versus association with disease progression may have contributed to different aspects of this meta-analysis. Publications with duplicated data are listed below:

Kojima *et al.*, 2021. *PLOS ONE*: overlap with Kasai *et al.*, 2019.

- Included the correlation between CSF NfL and ALSFRS-R score and disease progression.

## Appendix 3. Outcome Assessment.

The ALSFRS-R is a validated scale that measures physical function in carrying out activities of daily living in patients with ALS.<sup>38</sup> We extracted ALSFRS-R for assessing the relationship between functional outcome and neurofilaments. The ALSFRS-R is also used to monitor the progression of disability in patients with ALS. We included those studies where the ALS disease progression rate was calculated by subtracting baseline ALSFRS-R from 48 (maximum ALSFRS-R score), divided by time (months) from symptom onset to baseline.<sup>39</sup> This is a commonly reported estimate of disease progression. Studies that used the D50 disease progression model instead of ALSFRS-R were excluded from the meta-analysis of neurofilaments and disease progression. Publications using the D50 method<sup>40</sup> instead of ALSFRS-R are outlined below:

Dreger *et al.*, 2021. *Frontiers in Neuroscience*.

Poesen *et al.*, 2017. *Neurology*:

- Modeled disease progression using the D50 and ALSFRS-R score.

#### **Appendix 4. QUADAS-2.**

A quality assessment of all included studies was conducted using the revised tool for the Quality Assessment of Diagnostic Studies 2 (QUADAS-2)<sup>41</sup> to assess the risk of bias in each selected study. Two investigators (P.S. and C.G.) assessed all articles independently and discrepancies were resolved by consensus. The QUADAS-2 tool evaluated four bias categories: patient selection, index test, reference test, and flow of timing of testing. It also grades the risk that this bias decreases the applicability of the results in the target population. Studies that were considered at high risk of bias were not included in the analysis. Studies that did not report diagnostic test accuracy or the data was not available the QUADAS-2 was not applied.

#### **Appendix 5. Quantification of Plasma and Serum NfL.**

We undertook a subanalysis of the relationship between plasma and serum NfL and for this purpose we included 26 healthy controls (16 females and 10 males, mean age 23 years, SD 4.7) who had undergone paired plasma and serum sampling at Sahlgrenska University Hospital, Mölndal, Sweden. All participants provided written informed consent. Blood samples were collected by venipuncture into EDTA or serum tubes and centrifuged within 20-60 minutes. Plasma and serum samples were aliquoted and stored at  $-80^{\circ}\text{C}$  pending biochemical analysis. NfL was measured in plasma and serum using the Single Molecule Array technology (Quanterix, Billerica, MA, USA).<sup>42, 43</sup> All analytes had an average coefficient of variance  $<5\%$ . The comparison of NfL in plasma and serum has not been published previously.

#### **Appendix 6. Statistical Analysis.**

The statistical plan was developed together with two statisticians (G.N. and N.S.). For meta-analysis of diagnostic accuracy, we extracted area under the curve (AUC), sensitivity and specificity. Forest plots of sensitivity and specificity was performed. Meta-analyses for AUC were performed using R package *mada* (<https://rdrr.io/rforge/mada/src/R/reitsma.R>). For studies that reported AUC and not the sensitivity and specificity, authors were contacted to provide the sensitivity and specificity. For estimating a hierarchical summary receiver-operating characteristics curve, a bivariate modeling approach in *mada* was taken on the recommendation of the authors. Median concentrations and spread (interquartile range or range) and or mean (standard deviation) for each biomarker were extracted for available studies. We also performed

a meta-analysis of medians for each biomarker using the quantile estimation method (*metamedian* package in R statistical software).<sup>44</sup> Meta-analysis for correlation data was performed using R package *metacor* (<https://cran.r-project.org/package=metacor>). Only Spearman's rank correlations ( $r_s$ ) were used in the analysis due to the likely skewed nature of the data and since most studies reported Spearman's rank correlations. For studies that reported other correlation methods than Spearman, the corresponding authors were contacted to provide the Spearman correlations. In addition, we summarized overall study characteristics stratified by disease and controls. We pooled mean age using a weighted fixed effects model (*meta* package in R statistical software). In studies that reported age as median (IQR), the mean (SD) was estimated.<sup>45</sup> The variability in studies and/or patients for each comparison is a reflection of difference in data collection and reporting between studies; some studies reported ROC curve data and some studies reported group summary statistics as median (IQR) or mean (SD). For studies that reported log-transformed means, authors were contacted to provide median (IQR) and mean (SD). The relationship between the biomarkers and survival was assessed either using a univariate correlation (Spearman's rank correlation) between the serum biomarkers and survival time when data was available or based on reported hazard ratio (HR). Meta-analysis for survival data was performed using R package *metafor* (<https://CRAN.R-project.org/package=metafor>). Heterogeneity was assessed using the Cochran's  $Q$  test and the  $I^2$  index. Lastly, we performed sample size calculations two ways: (1) based on the pooled meta-analysis data, and (2) based on two studies with longitudinal follow-up data. As per Witzel *et al.*, NfL was demonstrated as an important prognostic biomarker for sample size estimations that reliably compensated for clinical heterogeneity. Further, Benatar *et al.* supported the preferential use of serum NfL over pNfH for implementation in future trials. To be thorough, we thus compared the sample sizes needed to detect intervention effects using NfL and pNfH measured in various fluid sources (plasma, serum, or CSF neurofilaments). The longitudinal data only used serum NfL; holding variance constant, sample sizes were estimated based on paired comparisons of expected change in NfL at ranging effect sizes. Effect sizes were calculated using Cohen's  $d$ .<sup>46</sup> We used the n80 criteria for assessing the efficiency of neurofilaments as outcome measures in future phase 2 ALS interventional trials.<sup>47</sup> The required sample size per calculation method assumed 80% power to detect a significant effect ( $\alpha = 0.05$ ) and varied as a function of putative

treatment effectiveness or effect size. All analyses were performed using R statistical software, version 4.0.4 (R Core Team).

| <b>Table S1. Study Characteristics</b>                        |                     |                                                                |                |                                              |                 |                               |
|---------------------------------------------------------------|---------------------|----------------------------------------------------------------|----------------|----------------------------------------------|-----------------|-------------------------------|
| <b>Study</b>                                                  | <b>Study Design</b> | <b>Study Cohorts</b>                                           | <b>Country</b> | <b>Biomarkers Assessed</b>                   | <b>Assay</b>    | <b>Number of Participants</b> |
| Abu-Rumeileh et al (2020) <sup>48</sup><br>PMID:<br>32100123  | Prospective         | ALS, ALS mimics, and healthy controls                          | Italy          | CSF NfL                                      | ELISA           | 169                           |
| Behzadi et al (2021) <sup>49</sup><br>PMID:<br>34764380       | Retrospective       | ALS, ALS mimics, and controls                                  | Sweden         | CSF pNfH, CSF NfL, and plasma NfL            | ELISA and Simoa | 287                           |
| Benatar et al (2018) <sup>7</sup><br>PMID:<br>30014505        | Prospective         | Pre-symptomatic familial ALS and controls                      | USA            | CSF and serum NfL                            | MSD             | 145                           |
| Benatar et al (2019) <sup>3</sup><br>PMID:<br>31432691        | Prospective         | Pre-symptomatic familial ALS and controls                      | USA            | CSF pNfH, serum pNfH, CSF NfL, serum NfL     | ELISA           | 115                           |
| Benatar et al (2020) <sup>4</sup><br>PMID:<br>32385188        | Prospective         | ALS, primary lateral sclerosis, and progressive muscle atrophy | USA            | CSF pNfH, serum pNfH, CSF NfL, and serum NfL | Simoa           | 260                           |
| Boylan et al (2012) <sup>5</sup><br>PMID:<br>23117489         | Prospective         | ALS                                                            | USA            | CSF, plasma, and serum pNfH                  | ELISA           | 63                            |
| Brettschneider et al (2006) <sup>6</sup><br>PMID:<br>16567701 | Prospective         | ALS, Alzheimer's disease, and healthy controls                 | Germany        | CSF pNfH                                     | ELISA           | 175                           |
| Costa et al (2021) <sup>50</sup><br>PMID:<br>34359293         | -                   | ALS and other neurological disorders                           | Portugal       | CSF pNfH                                     | ELISA           | 58                            |

|                                                                 |               |                                                                  |                   |                             |       |     |
|-----------------------------------------------------------------|---------------|------------------------------------------------------------------|-------------------|-----------------------------|-------|-----|
| Chen et al (2016) <sup>51</sup><br>PMID:<br>27634542            | Prospective   | ALS and controls                                                 | China             | CSF pNfH                    | ELISA | 80  |
| De Schaepdryver et al (2018) <sup>52</sup><br>PMID:<br>29054919 | Retrospective | ALS, disease controls, and ALS mimics                            | Belgium           | CSF and serum pNfH          | ELISA | 331 |
| De Schaepdryver et al (2019) <sup>53</sup><br>PMID:<br>31518073 | Retrospective | ALS, mild cognitive impairment, and controls                     | Belgium           | Serum pNfH                  | ELISA | 215 |
| De Schaepdryver et al (2020) <sup>54</sup><br>PMID:<br>32029541 | Retrospective | ALS                                                              | Belgium and Italy | Serum                       | ELISA | 383 |
| De Schaepdryver et al (2023) <sup>55</sup><br>PMID:<br>36047371 | Retrospective | ALS, disease control                                             | Belgium           | CSF NfL and CSF pNfH        | ELISA | 348 |
| Dreger et al (2021) <sup>9</sup><br>PMID:<br>36047371           | Prospective   | ALS                                                              | Germany           | CSF NfL                     | ELISA | 238 |
| Escal et al. 2022 <sup>10</sup><br>PMID:<br>34313819            | Retrospective | ALS, FTD-ALS, FTD, and PPD                                       | France            | CSF and plasma NfL and pNfH | Simoa | 81  |
| Falzone et al. 2020 <sup>11</sup><br>PMID:<br>32306171          | Retrospective | ALS                                                              | Italy             | Serum pNfH                  | ELISA | 219 |
| Falzone et al. 2022 <sup>12</sup><br>PMID:<br>35263489          | Prospective   | ALS, ALS mimics, other neurodegenerative disorders, and controls | Italy             | Serum NfL                   | Simoa | 328 |



|                                                             |               |                                                                                |                |                                |                 |     |
|-------------------------------------------------------------|---------------|--------------------------------------------------------------------------------|----------------|--------------------------------|-----------------|-----|
| Feneberg et al. 2018 <sup>56</sup><br>PMID:<br>29212830     | Prospective   | Early and late ALS, other neurologic diseases, and motor neuron disease mimics | Germany        | CSF NfL and pNfH and serum NfL | ELISA and Simoa | 253 |
| Gagliardi et al. 2021 <sup>13</sup><br>PMID:<br>33609080    | Prospective   | ALS, spinal muscle atrophy and healthy controls                                | Italy          | CSF NfL and CSF pNfH           | ELISA           | 129 |
| Gaiani et al. 2017 <sup>14</sup><br>PMID:<br>28264096       | Retrospective | ALS, FTD, motor neuron disease and controls                                    | Italy          | CSF NfL                        | ELISA           | 176 |
| Ganesalingam et al. 2011 <sup>16</sup><br>PMID:<br>21418221 | Retrospective | ALS, disease control and healthy control                                       | USA            | CSF pNfH                       | ELISA           | 163 |
| Ganesalingam et al. 2013 <sup>15</sup><br>PMID:<br>23134506 | Retrospective | ALS and disease controls                                                       | Sweden         | CSF pNfH                       | ELISA           | 290 |
| Gendron et al. 2017 <sup>57</sup><br>PMID:<br>28628244      | Prospective   | <i>C9ORF72</i> -ALS versus non- <i>C9ORF72</i> -ALS                            | USA/Multi-site | CSF pNfH                       | ELISA           | 242 |
| Gille et al. 2019 <sup>58</sup><br>PMID:<br>29908069        | Prospective   | ALS, ALS mimics, and disease controls                                          | Belgium        | CSF and serum NfL              | ELISA           | 250 |
| Gong et al. 2018 <sup>17</sup><br>PMID:<br>29898446         | Prospective   | ALS and controls                                                               | China          | CSF and serum NfL              | ELISA           | 120 |
| Gonçalves et al (2015) <sup>18</sup><br>PMID:<br>25261856   | -             | ALS                                                                            | Portugal       | CSF pNfH                       | ELISA           | 46  |

|                                                             |               |                                                                             |         |                                                          |       |     |
|-------------------------------------------------------------|---------------|-----------------------------------------------------------------------------|---------|----------------------------------------------------------|-------|-----|
| Halbgebauer et al (2021) <sup>59</sup><br>PMID:<br>34417339 | Prospective   | ALS, FTD, AD,<br>PD, PDD, CJD,<br>and non-<br>neurodegenerative<br>controls | Germany | CSF NfL,<br>serum NfL,<br>CSF pNfH,<br>and serum<br>pNfH | ELISA | 294 |
| Illan-Gala et al. 2018 <sup>60</sup><br>PMID:<br>30291183   | Prospective   | ALS, FTD, and<br>controls                                                   | Spain   | CSF NfL                                                  | ELISA | 173 |
| Kasai et al. 2019 <sup>61</sup><br>PMID:<br>31742901        | Prospective   | ALS and non-<br>neurodegenerative<br>controls                               | Japan   | CSF and<br>plasma NfL                                    | Simoa | 150 |
| Kojima et al. 2021 <sup>20</sup><br>PMID:<br>34843548       | Retrospective | ALS                                                                         | Japan   | CSF and<br>plasma NfL                                    | Simoa | 75  |
| Klärpe et al. 2019 <sup>19</sup><br>PMID:<br>34151677       | Retrospective | ALS, ALS<br>mimics, and<br>healthy controls                                 | Sweden  | CSF NfL                                                  | ELISA | 286 |
| Li et al. 2016 <sup>22</sup><br>PMID:<br>27423602           | Prospective   | ALS, multiple<br>system atrophy,<br>and controls                            | China   | CSF and<br>plasma<br>pNfH                                | ELISA | 93  |
| Li et al (2018) <sup>21</sup><br>PMID:<br>30210445          | Prospective   | ALS and controls                                                            | China   | CSF NfL<br>and CSF<br>pNfH                               | ELISA | 86  |
| Lu et al (2015) <sup>23</sup><br>PMID:<br>25934855          | Prospective   | ALS and healthy<br>controls                                                 | England | CSF and<br>blood NfL                                     | ELISA | 245 |
| Menke et al (2015) <sup>62</sup><br>PMID:<br>26273687       | -             | ALS and controls                                                            | England | CSF NfL                                                  | ELISA | 42  |
| Poesen et al (2017) <sup>25</sup><br>PMID:<br>28500227      | Prospective   | ALS, neurologic<br>disease controls,<br>and disease<br>mimics               | Belgium | CSF NfL<br>and CSF<br>pNfH                               | ELISA | 586 |

|                                                          |               |                                                                                           |             |                                                          |       |     |
|----------------------------------------------------------|---------------|-------------------------------------------------------------------------------------------|-------------|----------------------------------------------------------|-------|-----|
| Reijn et al (2009) <sup>26</sup><br>PMID:<br>19296046    | Retrospective | ALS and ALS<br>mimics                                                                     | Netherlands | CSF NfL<br>and CSF<br>pNfH                               | ELISA | 58  |
| Rosengren et al (1996) <sup>63</sup><br>PMID:<br>8863508 | Retrospective | ALS,<br>neurologically<br>healthy controls,<br>and other<br>neurodegenerative<br>diseases | Sweden      | CSF NfL                                                  | ELISA | 92  |
| Rossi et al. 2018 <sup>64</sup><br>PMID:<br>29322259     | Prospective   | ALS and mixed<br>neurologic<br>disease                                                    | Italy       | CSF NfL<br>and pNfH                                      | ELISA | 320 |
| Saracino et al. 2021 <sup>65</sup><br>PMID:<br>34349004  | Prospective   | <i>C9ORF72</i> -ALS<br>and <i>GRN</i> cohorts,<br>and controls                            | France      | Plasma NfL                                               | Simoa | 352 |
| Scarafino et al. 2018 <sup>66</sup><br>PMID:<br>30116940 | Retrospective | ALS, disease<br>mimics, and non-<br>neurodegenerative<br>diseases                         | Italy       | CSF NfL                                                  | ELISA | 166 |
| Schreiber et al. 2018 <sup>67</sup><br>PMID:<br>30187162 | Retrospective | ALS and disease<br>controls                                                               | Germany     | CSF NfL                                                  | ELISA | 122 |
| Shi et al. 2021 <sup>27</sup><br>PMID:<br>34866307       | Prospective   | ALS and<br>noninflammatory<br>neurologic<br>controls                                      | China       | CSF NfL,<br>serum NfL,<br>CSF pNfH,<br>and serum<br>pNfH | ELISA | 82  |
| Simonini et al. 2021 <sup>28</sup><br>PMID:<br>34829852  | Retrospective | ALS, primary<br>lateral sclerosis,                                                        | Switzerland | CSF and<br>serum pNfH                                    | ELISA | 143 |

|                                                           |             |                                                                                          |         |                    |       |     |
|-----------------------------------------------------------|-------------|------------------------------------------------------------------------------------------|---------|--------------------|-------|-----|
| Steinacker et al. 2017 <sup>30</sup><br>PMID:<br>27819158 | Prospective | ALS and controls                                                                         | Germany | CSF and serum NfL  | ELISA | 153 |
| Sugimoto et al. 2020 <sup>35</sup><br>PMID:<br>33424740   | Prospective | ALS and healthy controls                                                                 | China   | Serum NfL          | Simoa | 50  |
| Sun et al. 2020 <sup>31</sup><br>PMID:<br>32982935        | Prospective | ALS, other neurological disorders and controls                                           | China   | CSF NfL            | ELISA | 117 |
| Thompson et al. 2019 <sup>32</sup><br>PMID:<br>31123140   | Prospective | ALS, PLS, disease mimics, and controls                                                   | England | CSF pNfH           | ELISA | 134 |
| Thompson et al. 2022 <sup>33</sup><br>PMID:<br>35224491   | Prospective | ALS, disease controls, and healthy controls                                              | England | CSF and plasma NfL | ELISA | 439 |
| Tortelli et al. 2012 <sup>68</sup><br>PMID:<br>22680408   | Prospective | ALS, chronic inflammatory demyelinating neuropathy, and other neurodegenerative diseases | Italy   | CSF NfL            | ELISA | 83  |
| Thouvenot et al. 2020 <sup>34</sup><br>PMID:<br>31437330  | Prospective | ALS and controls                                                                         | France  | Serum NfL          | Simoa | 198 |

|                                                           |               |                                                                               |                    |                                  |       |     |
|-----------------------------------------------------------|---------------|-------------------------------------------------------------------------------|--------------------|----------------------------------|-------|-----|
| Vacchiano et al. 2021 <sup>69</sup><br>PMID:<br>34744694  | Prospective   | ALS and disease mimics                                                        | Italy              | CSF and plasma NfL               | Simoa | 231 |
| Verde et al. 2019 <sup>70</sup><br>PMID:<br>30309882      | Prospective   | ALS, other neurodegenerative diseases, and without neurodegenerative diseases | Germany            | Serum NfL                        | Simoa | 283 |
| Verde et al. 2023 <sup>71</sup><br>PMID: 37009451         | Retrospective | ALS and healthy control                                                       | Italy              | Serum NfL                        | Simoa | 255 |
| Weydt et al. 2016 <sup>36</sup><br>PMID:<br>26528863      | Prospective   | Symptomatic and asymptomatic ALS carriers                                     | Germany and Sweden | CSF NfL, serum NfL, and CSF pNfH | ELISA | 95  |
| Witzel et al. 2021 <sup>72</sup><br>PMID: 34433481        | Prospective   | ALS                                                                           | Multisite          | Serum NfL                        | Simoa | 125 |
| Yamada et al. 2021 <sup>73</sup><br>PMID:<br>33737450     | Prospective   | ALS and controls                                                              | Japan              | Serum NfL                        | Simoa | 113 |
| Zecca et al. 2022 <sup>37</sup><br>PMID:<br>35715961      | Retrospective | ALS and controls                                                              | Italy              | Plasma pNfH                      | ELISA | 256 |
| Zetterberg et al. 2007 <sup>74</sup><br>PMID:<br>17903209 | Retrospective | Sporadic ALS, familial ALS, other neurological disorder, and healthy controls | Sweden             | CSF NfL                          | ELISA | 325 |
| Zhang et al. 2022 <sup>75</sup><br>PMID:                  | Prospective   | ALS                                                                           | China              | Serum NfL                        | Simoa | 103 |

|          |  |  |  |  |  |  |
|----------|--|--|--|--|--|--|
| 35280276 |  |  |  |  |  |  |
|----------|--|--|--|--|--|--|

| <b>Table S2. Excluded Studies</b>                       |                     |                                                                                                                                                                                 |                    |                                |              |                |                                                                              |
|---------------------------------------------------------|---------------------|---------------------------------------------------------------------------------------------------------------------------------------------------------------------------------|--------------------|--------------------------------|--------------|----------------|------------------------------------------------------------------------------|
| <b>Study</b>                                            | <b>Study Design</b> | <b>Study Cohorts</b>                                                                                                                                                            | <b>Country</b>     | <b>Biomarkers Assessed</b>     | <b>Assay</b> | <b>Total N</b> | <b>Reason for Exclusion</b>                                                  |
| Bjornevik et al (2021) <sup>8</sup><br>PMID: 34380747   | Prospective         | ALS and controls                                                                                                                                                                | USA                | Plasma NfL                     | Simoa        | 271            | Survival analyses and data could not be extracted from the figures           |
| Brodovitch et al (2021) <sup>76</sup><br>PMID: 33436881 | Prospective         | ALS and peripheral inflammatory polyneuropathy                                                                                                                                  | France             | CSF and serum NfL              | ELISA        | 154            | Demographic data could not be extracted for all the groups                   |
| Delaby et al. (2020) <sup>77</sup><br>PMID: 32514050    | Retrospective       | Down syndrome, Alzheimer's dementia, dementia with Lewy Bodies, Frontotemporal dementia, corticobasal syndrome, progressive supranuclear palsy, and cognitively normal controls | Spain              | CSF NfL                        | ELISA        | 535            | Not a primary ALS study                                                      |
| Davies et al (2023)<br>PMID: 37292457                   | Prospective         | ALS and primary lateral sclerosis and 19 alternative diagnoses                                                                                                                  | UK                 | Serum NfL                      | ELISA        | 133            | Tertiary clinic referral for suspect ALS                                     |
| Dorst et al (2023)<br>PMID: 36917918                    | Prospective         | ALS mutations carriers and non-carriers                                                                                                                                         | Germany and Sweden | Body composition and Serum NfL | ELISA        | 133            | Not primarily an ALS diagnostic or prognostic study assessing neurofilaments |

|                                                        |               |                               |                |                                                                       |                    |     |                                                                                                        |
|--------------------------------------------------------|---------------|-------------------------------|----------------|-----------------------------------------------------------------------|--------------------|-----|--------------------------------------------------------------------------------------------------------|
| Gray et al. (2020) <sup>78</sup><br>PMID: 32558597     | Retrospective | ALS and controls              | Germany        | CSF NfL, plasma NfL, serum NfL, CSF pNfH, plasma pNfH, and serum pNfH | Multiple Assays    | 10  | Assay reliability and inter-laboratory variability                                                     |
| Huang et al. (2020) <sup>79</sup><br>PMID: 32515902    | Retrospective | ALS and controls              | USA            | CSF NfL, plasma NfL, CSF pNfH, plasma pNfH                            | ELISA (MSD, Simoa) | 149 | Reported percent changes and values from figures could not be accurately digitized                     |
| Ingannato et al (2021) <sup>80</sup><br>PMID: 34539331 | Prospective   | ALS and bv-FTD and nv-PPA     | Italy          | Plasma NfL                                                            | Simoa              | 106 | Data log-transformed and could not be accurately converted                                             |
| Kaiserova et al (2017) <sup>81</sup><br>PMID: 28185258 | Prospective   | ALS and controls              | Czech Republic | CSF pNfH                                                              | ELISA              | 31  | Neurofilament values could not be accurately extracted from the figures                                |
| Lombardi et al (2019) <sup>82</sup><br>PMID: 30787165  | Prospective   | ALS, SBMA, and controls       | UK and Italy   | Plasma NfL, serum NfL                                                 | Simoa              | 292 | Not primarily an ALS study and neurofilament values could not be accurately extracted from the figures |
| Lu et al (2014) <sup>24</sup><br>PMID: 25009280        | Prospective   | ALS and controls              | England        | Plasma pNfH                                                           | ELISA              | 240 | Data could not be extracted from the figures                                                           |
| Li et al (2023)<br>PMID: 37070132                      | Prospective   | ALS and spinal muscle atrophy | China          | Serum Cr, CSF NfL, and CSF pNfH                                       | ELISA              |     | Not primarily and ALS study                                                                            |



|                                                           |               |                                                                                             |           |                    |       |      |                                                                                    |
|-----------------------------------------------------------|---------------|---------------------------------------------------------------------------------------------|-----------|--------------------|-------|------|------------------------------------------------------------------------------------|
| Meyer et al (2023)<br>PMID:<br>36899448                   | Prospective   | ALS                                                                                         | Germany   | Serum NfL          | Simoa | 1378 | Data z transformed                                                                 |
| McCombe et al. 2014 <sup>83</sup><br>PMID:<br>25958264    | Prospective   | ALS and controls                                                                            | Australia | Serum pNfH         | ELISA | 157  | Data could not be extracted from the figures                                       |
| Oeckl et al. 2016 <sup>84</sup><br>PMID:<br>27415180      | Retrospective | ALS and controls                                                                            | Multisite | CSF NfL, CSF pNfH  | ELISA | 150  | Assessed neurofilament variability between centers                                 |
| Pawlitzi et al. 2018 <sup>85</sup><br>PMID:<br>30631300   | Retrospective | ALS, Primary progressive multiple sclerosis, and healthy controls                           | Germany   | CSF NfL            | ELISA | 150  | Primarily a multiple sclerosis study that included an ALS group for comparison     |
| Sabbatini et al. 2021 <sup>86</sup><br>PMID:<br>34264016  | Retrospective | ALS and other MNDs and controls                                                             | Italy     | CSF NfL, serum NfL | ELISA | 160  | Not primarily an ALS study.                                                        |
| Steinacker et al. 2015 <sup>29</sup><br>PMID:<br>26296871 | Prospective   | ALS, primary lateral sclerosis, motor neuron disease mimics and neurological control groups | Germany   | CSF NfL and pNfH   | ELISA | 455  | Not primarily an ALS study. Neurofilaments assessed across many MNDs including ALS |
| Tortelli et al. 2014 <sup>87</sup><br>PMID:<br>24750431   | Prospective   | Sporadic ALS                                                                                | Italy     | CSF NfL            | ELISA | 37   | Data on NfL could not be extracted from the figures                                |
| Verde et al. 2023                                         | Restropective | ALS                                                                                         | Italy     | Plasma P-tau 181   | ELISA | 29   | P-tau study                                                                        |

|                                                         |             |                                                                                     |         |                    |       |     |                                                                                        |
|---------------------------------------------------------|-------------|-------------------------------------------------------------------------------------|---------|--------------------|-------|-----|----------------------------------------------------------------------------------------|
| PMID:<br>37369876                                       |             |                                                                                     |         |                    |       |     |                                                                                        |
| Yamada et al. 2021 <sup>73</sup><br>PMID:<br>33737450   | Prospective | ALS and controls                                                                    | Japan   | Serum NfL          | Simoa | 113 | No primarily an ALS study and sensitivity, specificity and IQR could not be extracted  |
| Wilke et al. 2018 <sup>88</sup><br>PMID:<br>30009206    | Prospective | Hereditary spastic paraplegia, ALS, and controls                                    | Germany | Serum NfL          | Simoa | 225 | Primarily a hereditary spastic paraplegia study that included ALS group for comparison |
| Zucchi et al. (2018) <sup>89</sup><br>PMID:<br>30428468 | Prospective | ALS, primary lateral sclerosis, hereditary spastic paraplegia, and healthy controls | Italy   | CSF and serum pNfH | ELISA | 39  | Primarily an upper motor syndrome study                                                |

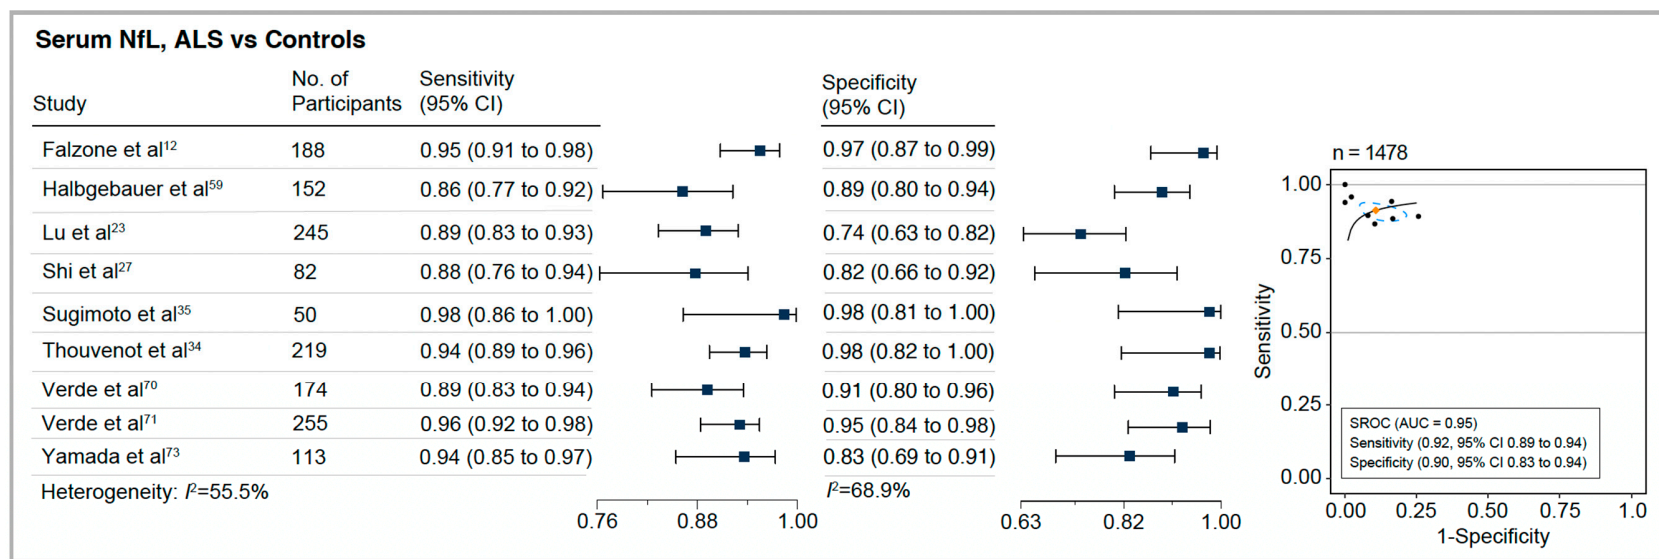

**Figure S1. Forest Plots and Receiver Operating Characteristics Curves for the Diagnostic Accuracy of Serum NfL.** Forest plots of sensitivity, specificity, and Summary Receiver Operating Characteristic (SROC) and their confidence intervals are presented. Each individual dot represents a unique study. The orange diamond represents the summary estimate of sensitivity and false-positive rate (1-specificity), and the dotted circle represents the 95% confidence region. On top of the SROC, “n” represents the total number of participants in the analyses.

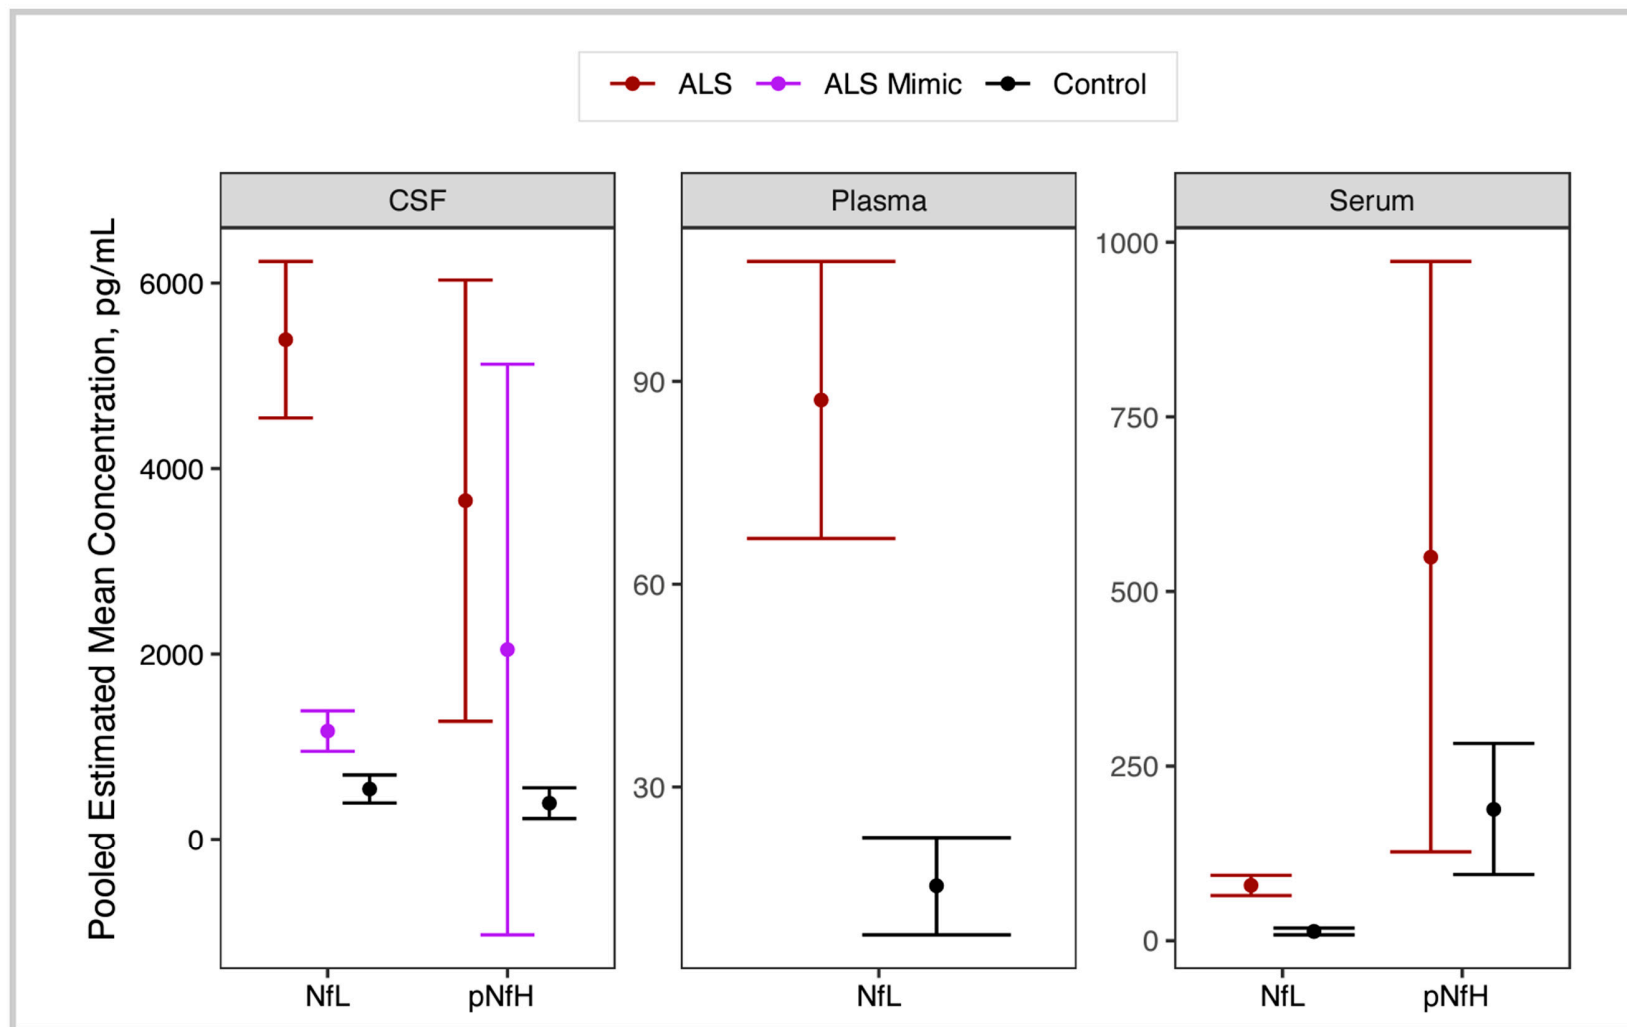

**Figure S2. Group Differences in Biomarkers Between ALS, ALS Mimic, and Controls.**

The pooled mean concentration and spread (confidence interval) are reported for NfL and pNfH in patients with ALS, ALS mimics, and controls.

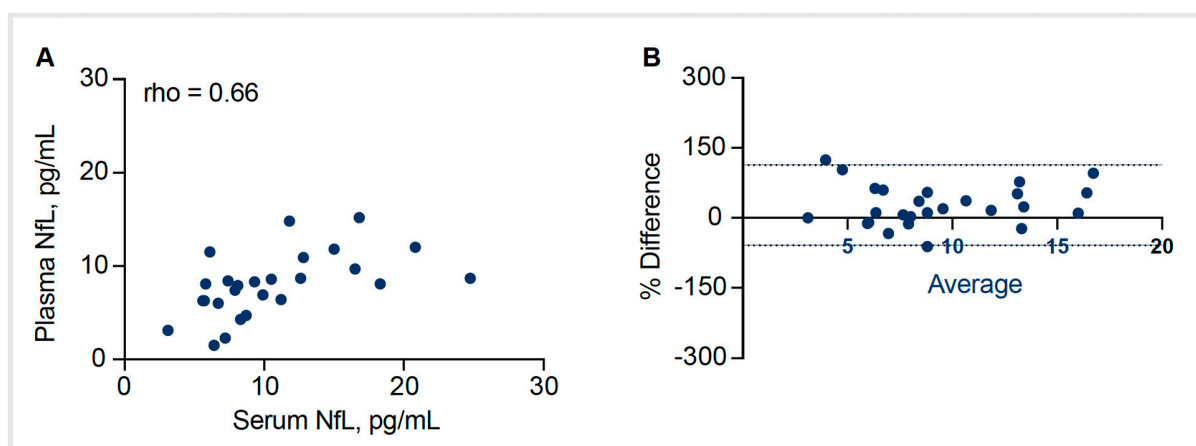

**Figure S3. Correlation Plasma and Serum NfL.**

(A) shows the correlation between plasma and serum NfL. (B) shows the Bland-Altman agreement plot of the plasma and serum NfL. Single dots indicate NfL in plasma and serum with their mean concentrations on the x-axis and the difference in concentration between the two sources on the y-axis. The dashed horizontal lines indicate the upper and lower 95% confidence intervals for the mean difference between plasma and serum concentration.

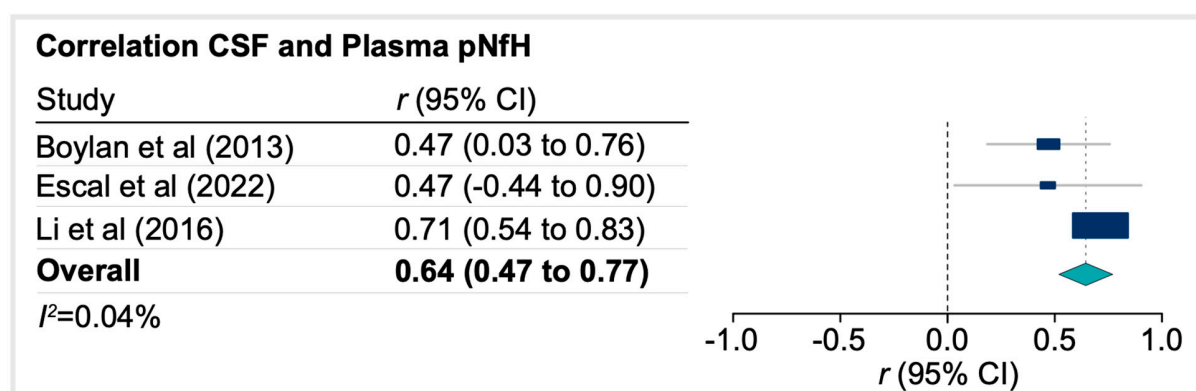

**Figure S4. Meta-analysis of Correlation CSF and Plasma pNfH.**

The correlations were calculated using the Spearman's rank correlation. Markers indicate estimates, with the size of the marker indicating weight; horizontal lines represent 95% CIs; diamond represent summary estimate, with the outer points indicating 95% confidence intervals.

<sup>c</sup>Mayo cohort (4 month)<sup>5</sup>

**A CSF NfL and ALSFRS-R**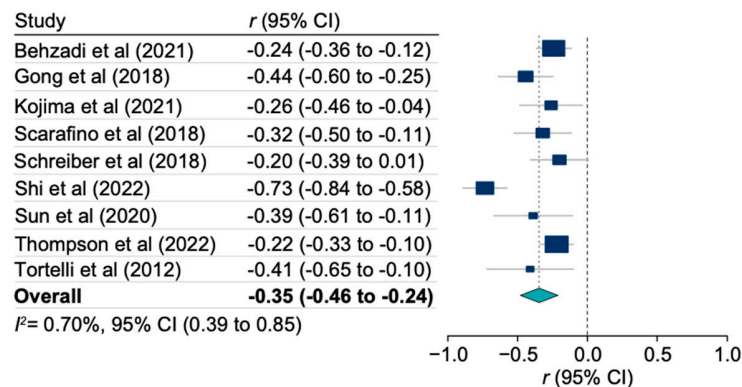**C CSF NfL and Disease Progression**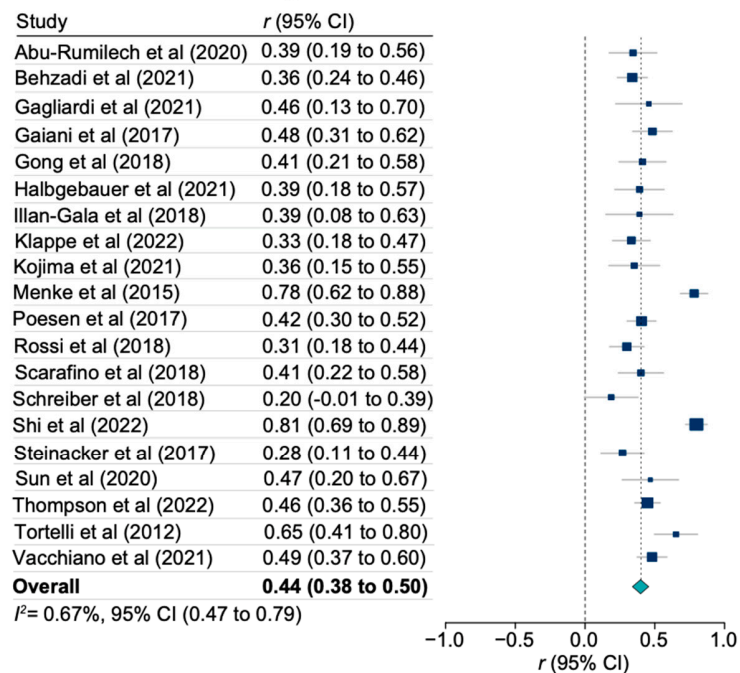**B CSF pNfH and ALSFRS-R**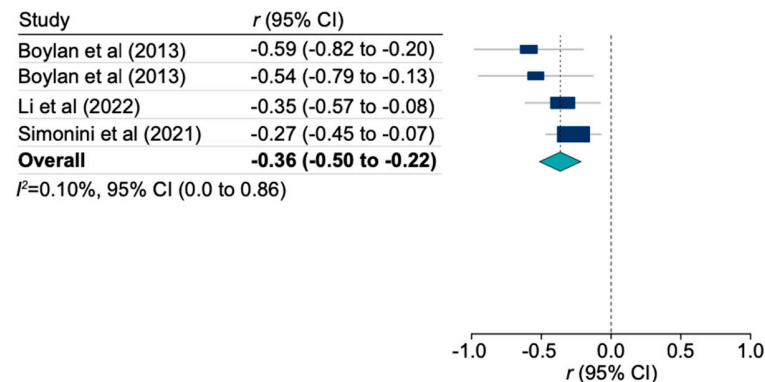**D CSF pNfH and Disease Progression**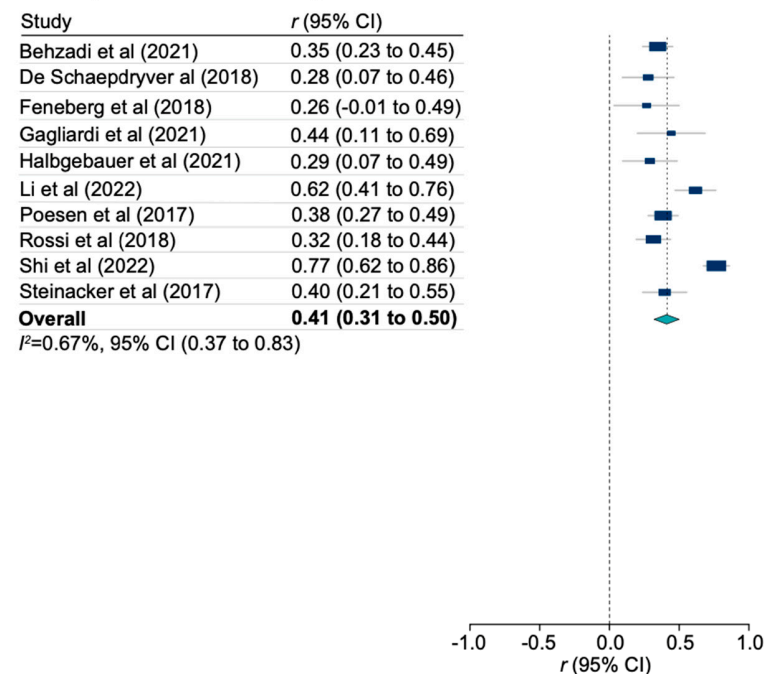

**Figure S5. Meta-analysis of Relationships of pNfH and NfL Measured in CSF and ALSFRS-R and Disease Progression. (A)**

Correlation cerebrospinal fluid (CSF) NfL with ALS Functional Rating Scale (ALSFRS-R). **(B)** Correlation CSF pNfH with ALSFRS-R. **(D)** Correlation CSF NfL with disease progression. **(D)** Correlation CSF pNfH with disease progression. All correlations shown are Spearman's rank correlations. Markers indicate estimates, with the size of the marker indicating weight; horizontal lines represent 95% confidence intervals; diamonds represent summary estimates, with the outer points indicating 95% confidence intervals.



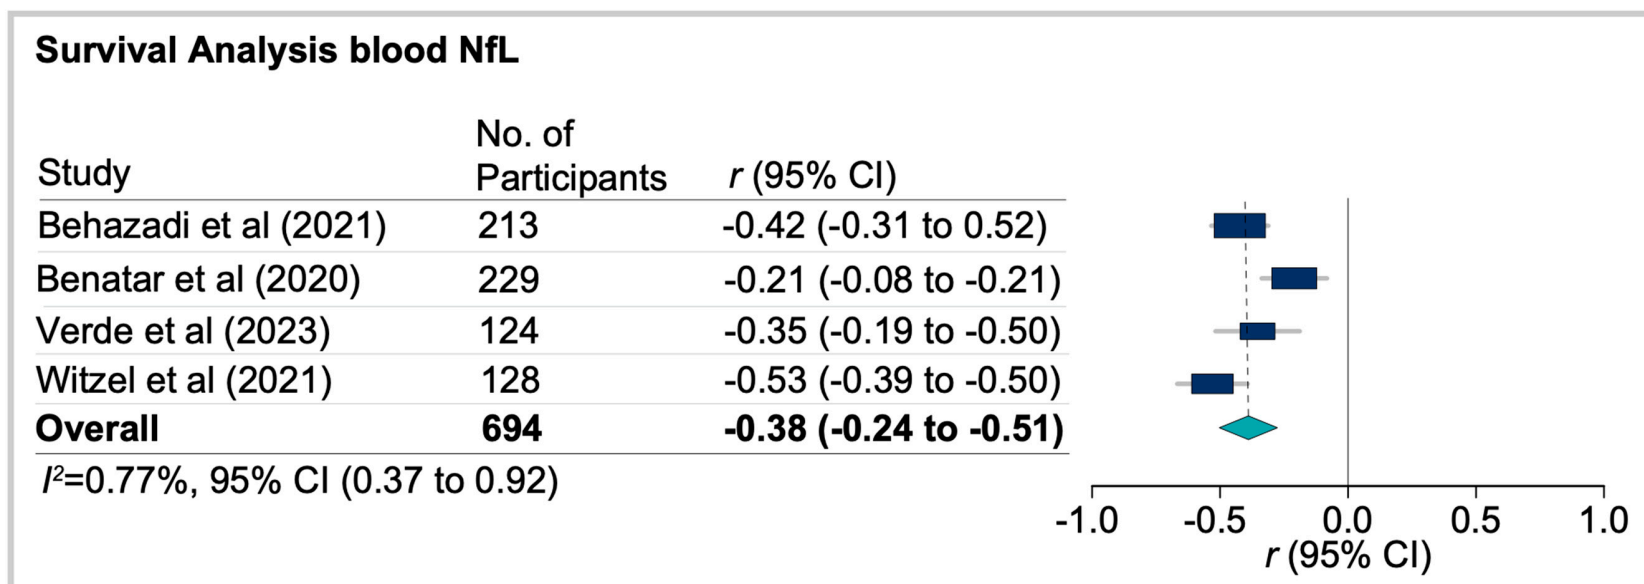

**Figure S6. Meta-analysis of Correlation Between Serum NfL and Survival Time.**

All correlations are Spearman's rank correlations. Markers indicate estimates, with the size of the marker indicating weight; horizontal lines represent 95% confidence intervals; diamonds represent summary estimates, with the outer points indicating 95% confidence intervals.

**Figure S7. Risk of Bias and Concerns for Applicability Assessment**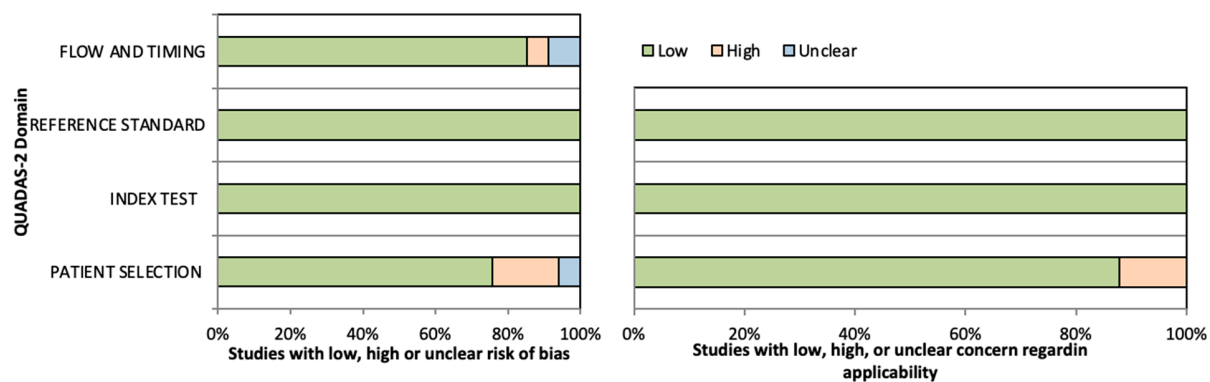

| <b>Table S3. Sample Size Per Group for Various Effect Estimates</b> |                       |            |                  |
|---------------------------------------------------------------------|-----------------------|------------|------------------|
| Treatment Effectiveness (%)                                         | Sample Size Per Group | Outcome    | Cohen's <i>d</i> |
| 10                                                                  | 137                   | CSF NfL    | 3.4              |
| 15                                                                  | 61                    | CSF NfL    | 3.4              |
| 20                                                                  | 34                    | CSF NfL    | 3.4              |
| 25                                                                  | 22                    | CSF NfL    | 3.4              |
| 30                                                                  | 15                    | CSF NfL    | 3.4              |
| 35                                                                  | 11                    | CSF NfL    | 3.4              |
| 40                                                                  | 9                     | CSF NfL    | 3.4              |
| 45                                                                  | 7                     | CSF NfL    | 3.4              |
| 50                                                                  | 5                     | CSF NfL    | 3.4              |
| 10                                                                  | 1425                  | CSF PNFH   | 1.0              |
| 15                                                                  | 633                   | CSF PNFH   | 1.0              |
| 20                                                                  | 356                   | CSF PNFH   | 1.0              |
| 25                                                                  | 228                   | CSF PNFH   | 1.0              |
| 30                                                                  | 158                   | CSF PNFH   | 1.0              |
| 35                                                                  | 116                   | CSF PNFH   | 1.0              |
| 40                                                                  | 89                    | CSF PNFH   | 1.0              |
| 45                                                                  | 70                    | CSF PNFH   | 1.0              |
| 50                                                                  | 57                    | CSF PNFH   | 1.0              |
| 10                                                                  | 99                    | Serum NfL  | 4.0              |
| 15                                                                  | 44                    | Serum NfL  | 4.0              |
| 20                                                                  | 25                    | Serum NfL  | 4.0              |
| 25                                                                  | 16                    | Serum NfL  | 4.0              |
| 30                                                                  | 11                    | Serum NfL  | 4.0              |
| 35                                                                  | 8                     | Serum NfL  | 4.0              |
| 40                                                                  | 6                     | Serum NfL  | 4.0              |
| 45                                                                  | 5                     | Serum NfL  | 4.0              |
| 50                                                                  | 4                     | Serum NfL  | 4.0              |
| 10                                                                  | 2020                  | Serum PNFH | 0.9              |
| 15                                                                  | 898                   | Serum PNFH | 0.9              |
| 20                                                                  | 505                   | Serum PNFH | 0.9              |
| 25                                                                  | 323                   | Serum PNFH | 0.9              |
| 30                                                                  | 224                   | Serum PNFH | 0.9              |
| 35                                                                  | 165                   | Serum PNFH | 0.9              |
| 40                                                                  | 126                   | Serum PNFH | 0.9              |
| 45                                                                  | 100                   | Serum PNFH | 0.9              |
| 50                                                                  | 81                    | Serum PNFH | 0.9              |
| 10                                                                  | 216                   | Plasma NfL | 2.7              |

|    |    |            |     |
|----|----|------------|-----|
| 15 | 96 | Plasma NfL | 2.7 |
| 20 | 54 | Plasma NfL | 2.7 |
| 25 | 35 | Plasma NfL | 2.7 |
| 30 | 24 | Plasma NfL | 2.7 |
| 35 | 18 | Plasma NfL | 2.7 |
| 40 | 14 | Plasma NfL | 2.7 |
| 45 | 11 | Plasma NfL | 2.7 |
| 50 | 9  | Plasma NfL | 2.7 |

| <b>Table S4. Sample Size for Paired Assessments at Various Effect Sizes using Longitudinal Studies<sup>30, 70</sup></b> |                       |           |
|-------------------------------------------------------------------------------------------------------------------------|-----------------------|-----------|
| Cohen's <i>d</i>                                                                                                        | Sample Size Per Group | Outcome   |
| 0.1                                                                                                                     | 825                   | Serum NfL |
| 0.2 (small effect)                                                                                                      | 208                   | Serum NfL |
| 0.3                                                                                                                     | 95                    | Serum NfL |
| 0.4                                                                                                                     | 55                    | Serum NfL |
| 0.5 (moderate effect)                                                                                                   | 36                    | Serum NfL |
| 0.6                                                                                                                     | 26                    | Serum NfL |
| 0.7                                                                                                                     | 20                    | Serum NfL |
| 0.8 (large effect)                                                                                                      | 16                    | Serum NfL |
| 0.9                                                                                                                     | 13                    | Serum NfL |

| <b>Table S5. Review of Studies of Neurofilaments in FTD-ALS Spectrum</b> |                                |                     |                      |                  |                                        |                                |                                                                        |
|--------------------------------------------------------------------------|--------------------------------|---------------------|----------------------|------------------|----------------------------------------|--------------------------------|------------------------------------------------------------------------|
| <b>Study</b>                                                             | <b>Genotypes</b>               | <b>Study Design</b> | <b>N<sup>a</sup></b> | <b>Biomarker</b> | <b>ALS compared to FTD<sup>b</sup></b> | <b>ALS compared to ALS-FTD</b> | <b>Biomarker Differences Across Genotype</b>                           |
| Saracino et al (2021) <sup>65</sup><br>PMID: 34349004                    | <i>C9orf72</i> ,<br><i>GRN</i> | Prospective         | 102                  | Plasma NfL       | Yes                                    | -                              | Higher plasma NfL in <i>GRN</i> than <i>C9ORF72</i> mutation carriers  |
| Escal et al (2022) <sup>10</sup><br>PMID: 34313819                       | <i>C9orf72</i> ,<br><i>GRN</i> | Retrospective       | 81                   | Plasma NfL       | Yes                                    | No                             | Higher plasma NfL in <i>GRN</i> than <i>C9ORF72</i> mutation carriers. |
| Escal et al (2022) <sup>10</sup><br>PMID: 34313819                       | <i>C9orf72</i> ,<br><i>GRN</i> | Retrospective       | 81                   | Plasma pNfH      | Yes                                    | Yes                            | No                                                                     |
| Gaiani et al (2017) <sup>14</sup><br>PMID: 28264096                      | <i>C9orf72</i>                 | Retrospective       | 114                  | CSF NfL          | Yes                                    | -                              | -                                                                      |
| Halbgebauer et al (2022) <sup>59</sup><br>PMID: 34417339                 | -                              | Prospective         | 88                   | CSF NfL          | No                                     | -                              | -                                                                      |
| Halbgebauer et al (2022) <sup>59</sup><br>PMID: 34417339                 | -                              | Prospective         | 88                   | CSF pNfH         | Yes                                    | -                              | -                                                                      |
| Halbgebauer et al (2022) <sup>59</sup><br>PMID: 34417339                 | -                              | Prospective         | 88                   | Serum NfL        | No                                     | -                              | -                                                                      |

|                                                                   |   |             |    |               |     |   |   |
|-------------------------------------------------------------------|---|-------------|----|---------------|-----|---|---|
| Halbgebauer<br>et al<br>(2022) <sup>59</sup><br>PMID:<br>34417339 | - | Prospective | 88 | Serum<br>pNfH | Yes | - | - |
|-------------------------------------------------------------------|---|-------------|----|---------------|-----|---|---|



| <b>Table S6. Review of Studies of Neurofilaments in ALS patients with genetic forms of disease.</b> |                                                                    |                     |                      |                  |                             |                                                               |
|-----------------------------------------------------------------------------------------------------|--------------------------------------------------------------------|---------------------|----------------------|------------------|-----------------------------|---------------------------------------------------------------|
| <b>Study</b>                                                                                        | <b>Genotypes</b>                                                   | <b>Study Design</b> | <b>N<sup>a</sup></b> | <b>Biomarker</b> | <b>Compared to Controls</b> | <b>Biomarker Differences Across Genotype</b>                  |
| Benatar et al (2018) <sup>7</sup><br>PMID: 30014505                                                 | <i>SOD1</i> ,<br><i>FUS</i> ,<br><i>C9orf72</i>                    | Prospective         | 94                   | Serum NfL        | No difference               | Not assessed                                                  |
| Benatar et al (2018) <sup>7</sup><br>PMID: 30014505                                                 | <i>SOD1</i> ,<br><i>FUS</i> ,<br><i>C9orf72</i>                    | Prospective         | 63                   | CSF NfL          | No difference               | Not assessed                                                  |
| Poesen et al (2017) <sup>25</sup><br>PMID: 28500227                                                 | <i>C9orf72</i>                                                     | Prospective         | 8                    | CSF pNfH         | No difference               | Not assessed                                                  |
| Weydt et al (2016) <sup>36</sup><br>PMID: 26528863                                                  | <i>SOD1</i> ,<br><i>FUS</i> ,<br><i>C9orf72</i> ,<br><i>TARDBP</i> | Prospective         | 7                    | CSF NfL          | No difference               | Not assessed                                                  |
| Weydt et al (2016) <sup>36</sup><br>PMID: 26528863                                                  | <i>SOD1</i> ,<br><i>FUS</i> ,<br><i>C9orf72</i> ,<br><i>TARDBP</i> | Prospective         | 9                    | CSF pNfH         | No difference               | Not assessed                                                  |
| Weydt et al (2016) <sup>36</sup><br>PMID: 26528863                                                  | <i>SOD1</i> ,<br><i>FUS</i> ,<br><i>C9orf72</i> ,<br><i>TARDBP</i> | Prospective         | 11                   | Blood NfL        | No difference               | Not assessed                                                  |
| Gendron et al (2017) <sup>57</sup><br>PMID: 28628244                                                | <i>C9orf72</i>                                                     | Prospective         | 135                  | CSF pNfH         | Yes                         | Increased CSF pNfH in <i>C9</i> -ALS carriers vs non-carriers |
| Saracino et al (2021) <sup>65</sup><br>PMID: 34349004                                               | <i>C9orf72</i> ,<br><i>GRN</i>                                     | Prospective         | 102                  | Plasma NfL       | Yes                         | Higher plasma NfL in <i>GRN</i> than <i>C9orf72</i>           |
| Verde et al (2019) <sup>70</sup><br>PMID: 30309882                                                  | <i>C9orf72</i> ,<br><i>SOD1</i>                                    | Prospective         | 136                  | Serum NfL        | Yes                         | No difference in serum NfL between                            |







## REFERENCES

1. Page MJ, McKenzie JE, Bossuyt PM, et al. The PRISMA 2020 statement: an updated guideline for reporting systematic reviews. *Rev Esp Cardiol (Engl Ed)* 2021;74:790-799.
2. McInnes MDF, Moher D, Thombs BD, et al. Preferred Reporting Items for a Systematic Review and Meta-analysis of Diagnostic Test Accuracy Studies: The PRISMA-DTA Statement. *JAMA* 2018;319:388-396.
3. Benatar M, Wu J, Lombardi V, et al. Neurofilaments in pre-symptomatic ALS and the impact of genotype. *Amyotroph Lateral Scler Frontotemporal Degener* 2019;20:538-548.
4. Benatar M, Zhang L, Wang L, et al. Validation of serum neurofilaments as prognostic and potential pharmacodynamic biomarkers for ALS. *Neurology* 2020;95:e59-e69.
5. Boylan KB, Glass JD, Crook JE, et al. Phosphorylated neurofilament heavy subunit (pNF-H) in peripheral blood and CSF as a potential prognostic biomarker in amyotrophic lateral sclerosis. *J Neurol Neurosurg Psychiatry* 2013;84:467-472.
6. Brettschneider J, Petzold A, Sussmuth SD, Ludolph AC, Tumani H. Axonal damage markers in cerebrospinal fluid are increased in ALS. *Neurology* 2006;66:852-856.
7. Benatar M, Wu J, Andersen PM, Lombardi V, Malaspina A. Neurofilament light: A candidate biomarker of presymptomatic amyotrophic lateral sclerosis and phenocconversion. *Ann Neurol* 2018;84:130-139.
8. Bjornevik K, O'Reilly EJ, Molsberry S, et al. Prediagnostic Neurofilament Light Chain Levels in Amyotrophic Lateral Sclerosis. *Neurology* 2021;97:e1466-1474.
9. Dreger M, Steinbach R, Gaur N, et al. Cerebrospinal Fluid Neurofilament Light Chain (NfL) Predicts Disease Aggressiveness in Amyotrophic Lateral Sclerosis: An Application of the D50 Disease Progression Model. *Front Neurosci* 2021;15:651651.
10. Escal J, Fourier A, Formaglio M, et al. Comparative diagnosis interest of NfL and pNfH in CSF and plasma in a context of FTD-ALS spectrum. *J Neurol* 2022;269:1522-1529.
11. Falzone YM, Domi T, Agosta F, et al. Serum phosphorylated neurofilament heavy-chain levels reflect phenotypic heterogeneity and are an independent predictor of survival in motor neuron disease. *J Neurol* 2020;267:2272-2280.
12. Falzone YM, Domi T, Mandelli A, et al. Integrated evaluation of a panel of neurochemical biomarkers to optimize diagnosis and prognosis in amyotrophic lateral sclerosis. *Eur J Neurol* 2022;29:1930-1939.
13. Gagliardi D, Faravelli I, Meneri M, et al. Diagnostic and prognostic value of CSF neurofilaments in a cohort of patients with motor neuron disease: A cross-sectional study. *J Cell Mol Med* 2021;25:3765-3771.
14. Gaiani A, Martinelli I, Bello L, et al. Diagnostic and Prognostic Biomarkers in Amyotrophic Lateral Sclerosis: Neurofilament Light Chain Levels in Definite Subtypes of Disease. *JAMA Neurol* 2017;74:525-532.
15. Ganesalingam J, An J, Bowser R, Andersen PM, Shaw CE. pNfH is a promising biomarker for ALS. *Amyotroph Lateral Scler Frontotemporal Degener* 2013;14:146-149.
16. Ganesalingam J, An J, Shaw CE, Shaw G, Lacomis D, Bowser R. Combination of neurofilament heavy chain and complement C3 as CSF biomarkers for ALS. *J Neurochem* 2011;117:528-537.
17. Gong ZY, Lv GP, Gao LN, Lu Y, Guo J, Zang DW. Neurofilament Subunit L Levels in the Cerebrospinal Fluid and Serum of Patients with Amyotrophic Lateral Sclerosis. *Neurodegener Dis* 2018;18:165-172.

18. Goncalves M, Tillack L, de Carvalho M, Pinto S, Conradt HS, Costa J. Phosphoneurofilament heavy chain and N-glycomics from the cerebrospinal fluid in amyotrophic lateral sclerosis. *Clin Chim Acta* 2015;438:342-349.
19. Klappe U, Chamoun S, Shen Q, et al. Cardiac troponin T is elevated and increases longitudinally in ALS patients. *Amyotroph Lateral Scler Frontotemporal Degener* 2022;23:58-65.
20. Kojima Y, Kasai T, Noto YI, et al. Amyotrophic lateral sclerosis: Correlations between fluid biomarkers of NfL, TDP-43, and tau, and clinical characteristics. *PLoS One* 2021;16:e0260323.
21. Li DW, Ren H, Jeromin A, et al. Diagnostic Performance of Neurofilaments in Chinese Patients With Amyotrophic Lateral Sclerosis: A Prospective Study. *Front Neurol* 2018;9:726.
22. Li S, Ren Y, Zhu W, Yang F, Zhang X, Huang X. Phosphorylated neurofilament heavy chain levels in paired plasma and CSF of amyotrophic lateral sclerosis. *J Neurol Sci* 2016;367:269-274.
23. Lu CH, Macdonald-Wallis C, Gray E, et al. Neurofilament light chain: A prognostic biomarker in amyotrophic lateral sclerosis. *Neurology* 2015;84:2247-2257.
24. Lu CH, Petzold A, Topping J, et al. Plasma neurofilament heavy chain levels and disease progression in amyotrophic lateral sclerosis: insights from a longitudinal study. *J Neurol Neurosurg Psychiatry* 2015;86:565-573.
25. Poesen K, De Schaepdryver M, Stubendorff B, et al. Neurofilament markers for ALS correlate with extent of upper and lower motor neuron disease. *Neurology* 2017;88:2302-2309.
26. Reijn TS, Abdo WF, Schelhaas HJ, Verbeek MM. CSF neurofilament protein analysis in the differential diagnosis of ALS. *J Neurol* 2009;256:615-619.
27. Shi J, Qin X, Chang X, Wang H, Guo J, Zhang W. Neurofilament markers in serum and cerebrospinal fluid of patients with amyotrophic lateral sclerosis. *J Cell Mol Med* 2022;26:583-587.
28. Simonini C, Zucchi E, Bedin R, et al. CSF Heavy Neurofilament May Discriminate and Predict Motor Neuron Diseases with Upper Motor Neuron Involvement. *Biomedicines* 2021;9.
29. Steinacker P, Feneberg E, Weishaupt J, et al. Neurofilaments in the diagnosis of motoneuron diseases: a prospective study on 455 patients. *J Neurol Neurosurg Psychiatry* 2016;87:12-20.
30. Steinacker P, Huss A, Mayer B, et al. Diagnostic and prognostic significance of neurofilament light chain NF-L, but not progranulin and S100B, in the course of amyotrophic lateral sclerosis: Data from the German MND-net. *Amyotroph Lateral Scler Frontotemporal Degener* 2017;18:112-119.
31. Sun Q, Zhao X, Li S, et al. CSF Neurofilament Light Chain Elevation Predicts ALS Severity and Progression. *Front Neurol* 2020;11:919.
32. Thompson AG, Gray E, Bampton A, Raciborska D, Talbot K, Turner MR. CSF chitinase proteins in amyotrophic lateral sclerosis. *J Neurol Neurosurg Psychiatry* 2019;90:1215-1220.
33. Thompson AG, Gray E, Verber N, et al. Multicentre appraisal of amyotrophic lateral sclerosis biofluid biomarkers shows primacy of blood neurofilament light chain. *Brain Commun* 2022;4:fcac029.
34. Thouvenot E, Demattei C, Lehmann S, et al. Serum neurofilament light chain at time of diagnosis is an independent prognostic factor of survival in amyotrophic lateral sclerosis. *Eur J Neurol* 2020;27:251-257.

35. Sugimoto K, Han Y, Song Y, Gao Y. Correlational Analysis of ALS Progression and Serum NfL Measured by Simoa Assay in Chinese Patients. *Front Neurol* 2020;11:579094.
36. Weydt P, Oeckl P, Huss A, et al. Neurofilament levels as biomarkers in asymptomatic and symptomatic familial amyotrophic lateral sclerosis. *Ann Neurol* 2016;79:152-158.
37. Zecca C, Dell'Abate MT, Pasculli G, et al. Role of plasma phosphorylated neurofilament heavy chain (pNfH) in amyotrophic lateral sclerosis. *J Cell Mol Med* 2022;26:3608-3615.
38. Cedarbaum JM, Stambler N, Malta E, et al. The ALSFRS-R: a revised ALS functional rating scale that incorporates assessments of respiratory function. BDNF ALS Study Group (Phase III). *J Neurol Sci* 1999;169:13-21.
39. Kimura F, Fujimura C, Ishida S, et al. Progression rate of ALSFRS-R at time of diagnosis predicts survival time in ALS. *Neurology* 2006;66:265-267.
40. Gebru T, Lentiro K. The impact of community-based health insurance on health-related quality of life and associated factors in Ethiopia: a comparative cross-sectional study. *Health Qual Life Outcomes* 2018;16:110.
41. Whiting PF, Rutjes AW, Westwood ME, et al. QUADAS-2: a revised tool for the quality assessment of diagnostic accuracy studies. *Ann Intern Med* 2011;155:529-536.
42. Rissin DM, Kan CW, Campbell TG, et al. Single-molecule enzyme-linked immunosorbent assay detects serum proteins at subfemtomolar concentrations. *Nat Biotechnol* 2010;28:595-599.
43. Shahim P, Gren M, Liman V, et al. Serum neurofilament light protein predicts clinical outcome in traumatic brain injury. *Sci Rep* 2016;6:36791.
44. McGrath S, Sohn H, Steele R, Benedetti A. Meta-analysis of the difference of medians. *Biom J* 2020;62:69-98.
45. Wan X, Wang W, Liu J, Tong T. Estimating the sample mean and standard deviation from the sample size, median, range and/or interquartile range. *BMC Med Res Methodol* 2014;14:135.
46. Cash DM, Rohrer JD, Ryan NS, Ourselin S, Fox NC. Imaging endpoints for clinical trials in Alzheimer's disease. *Alzheimers Res Ther* 2014;6:87.
47. Hua X, Lee S, Yanovsky I, et al. Optimizing power to track brain degeneration in Alzheimer's disease and mild cognitive impairment with tensor-based morphometry: an ADNI study of 515 subjects. *Neuroimage* 2009;48:668-681.
48. Abu-Rumeileh S, Vacchiano V, Zenesini C, et al. Diagnostic-prognostic value and electrophysiological correlates of CSF biomarkers of neurodegeneration and neuroinflammation in amyotrophic lateral sclerosis. *J Neurol* 2020;267:1699-1708.
49. Behzadi A, Pujol-Calderon F, Tjust AE, et al. Neurofilaments can differentiate ALS subgroups and ALS from common diagnostic mimics. *Sci Rep* 2021;11:22128.
50. Costa J, Gromicho M, Pronto-Laborinho A, et al. Cerebrospinal Fluid Chitinases as Biomarkers for Amyotrophic Lateral Sclerosis. *Diagnostics (Basel)* 2021;11.
51. Chen X, Chen Y, Wei Q, et al. Assessment of a multiple biomarker panel for diagnosis of amyotrophic lateral sclerosis. *BMC Neurol* 2016;16:173.
52. De Schaepdryver M, Jeromin A, Gille B, et al. Comparison of elevated phosphorylated neurofilament heavy chains in serum and cerebrospinal fluid of patients with amyotrophic lateral sclerosis. *J Neurol Neurosurg Psychiatry* 2018;89:367-373.
53. De Schaepdryver M, Goossens J, De Meyer S, et al. Serum neurofilament heavy chains as early marker of motor neuron degeneration. *Ann Clin Transl Neurol* 2019;6:1971-1979.

54. De Schaepdryver M, Lunetta C, Tarlarini C, et al. Neurofilament light chain and C reactive protein explored as predictors of survival in amyotrophic lateral sclerosis. *J Neurol Neurosurg Psychiatry* 2020;91:436-437.
55. De Schaepdryver M, Masrori P, Van Damme P, Poesen K. Effect of neurofilament analysis on the diagnostic delay in amyotrophic lateral sclerosis. *CNS Neurosci Ther* 2023;29:70-77.
56. Feneberg E, Oeckl P, Steinacker P, et al. Multicenter evaluation of neurofilaments in early symptom onset amyotrophic lateral sclerosis. *Neurology* 2018;90:e22-e30.
57. Gendron TF, Group CONS, Daugherty LM, et al. Phosphorylated neurofilament heavy chain: A biomarker of survival for C9ORF72-associated amyotrophic lateral sclerosis. *Ann Neurol* 2017;82:139-146.
58. Gille B, De Schaepdryver M, Goossens J, et al. Serum neurofilament light chain levels as a marker of upper motor neuron degeneration in patients with Amyotrophic Lateral Sclerosis. *Neuropathol Appl Neurobiol* 2019;45:291-304.
59. Halbgiebauer S, Steinacker P, Verde F, et al. Comparison of CSF and serum neurofilament light and heavy chain as differential diagnostic biomarkers for ALS. *J Neurol Neurosurg Psychiatry* 2022;93:68-74.
60. Illan-Gala I, Alcolea D, Montal V, et al. CSF sAPPbeta, YKL-40, and NfL along the ALS-FTD spectrum. *Neurology* 2018;91:e1619-e1628.
61. Kasai T, Kojima Y, Ohmichi T, et al. Combined use of CSF NfL and CSF TDP-43 improves diagnostic performance in ALS. *Ann Clin Transl Neurol* 2019;6:2489-2502.
62. Menke RA, Gray E, Lu CH, et al. CSF neurofilament light chain reflects corticospinal tract degeneration in ALS. *Ann Clin Transl Neurol* 2015;2:748-755.
63. Rosengren LE, Karlsson JE, Karlsson JO, Persson LI, Wikkelso C. Patients with amyotrophic lateral sclerosis and other neurodegenerative diseases have increased levels of neurofilament protein in CSF. *J Neurochem* 1996;67:2013-2018.
64. Rossi D, Volanti P, Brambilla L, Colletti T, Spataro R, La Bella V. CSF neurofilament proteins as diagnostic and prognostic biomarkers for amyotrophic lateral sclerosis. *J Neurol* 2018;265:510-521.
65. Saracino D, Dorgham K, Camuzat A, et al. Plasma NfL levels and longitudinal change rates in C9orf72 and GRN-associated diseases: from tailored references to clinical applications. *J Neurol Neurosurg Psychiatry* 2021;92:1278-1288.
66. Scarafino A, D'Errico E, Introna A, et al. Diagnostic and prognostic power of CSF Tau in amyotrophic lateral sclerosis. *J Neurol* 2018;265:2353-2362.
67. Schreiber S, Spotorno N, Schreiber F, et al. Significance of CSF NfL and tau in ALS. *J Neurol* 2018;265:2633-2645.
68. Tortelli R, Ruggieri M, Cortese R, et al. Elevated cerebrospinal fluid neurofilament light levels in patients with amyotrophic lateral sclerosis: a possible marker of disease severity and progression. *Eur J Neurol* 2012;19:1561-1567.
69. Vacchiano V, Mastrangelo A, Zenesini C, et al. Plasma and CSF Neurofilament Light Chain in Amyotrophic Lateral Sclerosis: A Cross-Sectional and Longitudinal Study. *Front Aging Neurosci* 2021;13:753242.
70. Verde F, Steinacker P, Weishaupt JH, et al. Neurofilament light chain in serum for the diagnosis of amyotrophic lateral sclerosis. *J Neurol Neurosurg Psychiatry* 2019;90:157-164.
71. Verde F, Milone I, Colombo E, et al. Phenotypic correlates of serum neurofilament light chain levels in amyotrophic lateral sclerosis. *Front Aging Neurosci* 2023;15:1132808.

72. Witzel S, Frauhammer F, Steinacker P, et al. Neurofilament light and heterogeneity of disease progression in amyotrophic lateral sclerosis: development and validation of a prediction model to improve interventional trials. *Transl Neurodegener* 2021;10:31.
73. Yamada S, Hashizume A, Hijikata Y, et al. Ratio of urinary N-terminal titin fragment to urinary creatinine is a novel biomarker for amyotrophic lateral sclerosis. *J Neurol Neurosurg Psychiatry* 2021;92:1072-1079.
74. Zetterberg H, Jacobsson J, Rosengren L, Blennow K, Andersen PM. Cerebrospinal fluid neurofilament light levels in amyotrophic lateral sclerosis: impact of SOD1 genotype. *Eur J Neurol* 2007;14:1329-1333.
75. Zhang L, Ji T, Wu C, et al. Serum Neurofilament Light Chain Levels May Be a Marker of Lower Motor Neuron Damage in Amyotrophic Lateral Sclerosis. *Front Neurol* 2022;13:833507.
76. Brodovitch A, Boucraut J, Delmont E, et al. Combination of serum and CSF neurofilament-light and neuroinflammatory biomarkers to evaluate ALS. *Sci Rep* 2021;11:703.
77. Delaby C, Alcolea D, Carmona-Iragui M, et al. Differential levels of Neurofilament Light protein in cerebrospinal fluid in patients with a wide range of neurodegenerative disorders. *Sci Rep* 2020;10:9161.
78. Gray E, Oeckl P, Amador MDM, et al. A multi-center study of neurofilament assay reliability and inter-laboratory variability. *Amyotroph Lateral Scler Frontotemporal Degener* 2020;21:452-458.
79. Huang F, Zhu Y, Hsiao-Nakamoto J, et al. Longitudinal biomarkers in amyotrophic lateral sclerosis. *Ann Clin Transl Neurol* 2020;7:1103-1116.
80. Ingannato A, Bagnoli S, Mazzeo S, et al. Neurofilament Light Chain and Intermediate HTT Alleles as Combined Biomarkers in Italian ALS Patients. *Front Neurosci* 2021;15:695049.
81. Kaiserova M, Grambalova Z, Otruba P, et al. Cerebrospinal fluid levels of chromogranin A and phosphorylated neurofilament heavy chain are elevated in amyotrophic lateral sclerosis. *Acta Neurol Scand* 2017;136:360-364.
82. Lombardi V, Querin G, Ziff OJ, et al. Muscle and not neuronal biomarkers correlate with severity in spinal and bulbar muscular atrophy. *Neurology* 2019;92:e1205-e1211.
83. McCombe PA, Pfluger C, Singh P, Lim CY, Airey C, Henderson RD. Serial measurements of phosphorylated neurofilament-heavy in the serum of subjects with amyotrophic lateral sclerosis. *J Neurol Sci* 2015;353:122-129.
84. Oeckl P, Jardel C, Salachas F, et al. Multicenter validation of CSF neurofilaments as diagnostic biomarkers for ALS. *Amyotroph Lateral Scler Frontotemporal Degener* 2016;17:404-413.
85. Pawlitzki M, Schreiber S, Bittner D, et al. CSF Neurofilament Light Chain Levels in Primary Progressive MS: Signs of Axonal Neurodegeneration. *Front Neurol* 2018;9:1037.
86. Sabbatini D, Raggi F, Ruggero S, et al. Evaluation of peripherin in biofluids of patients with motor neuron diseases. *Ann Clin Transl Neurol* 2021;8:1750-1754.
87. Tortelli R, Copetti M, Ruggieri M, et al. Cerebrospinal fluid neurofilament light chain levels: marker of progression to generalized amyotrophic lateral sclerosis. *Eur J Neurol* 2015;22:215-218.
88. Wilke C, Rattay TW, Hengel H, et al. Serum neurofilament light chain is increased in hereditary spastic paraplegias. *Ann Clin Transl Neurol* 2018;5:876-882.

89. Zucchi E, Bedin R, Fasano A, et al. Cerebrospinal Fluid Neurofilaments May Discriminate Upper Motor Neuron Syndromes: A Pilot Study. *Neurodegener Dis* 2018;18:255-261.
